# Supplementary material
Source: publisher figshare collection journal article supplement (https://asha.figshare.com/articles/dataset/_/23631519)
Supplement: Supplementary file 1 [file 1]

**Supplemental Material S1.** A copy of KLEAP-Q questionnaire validated in the present study.

**ಭಾಷಾ ಅನುಭವ ಮತ್ತು ಪ್ರಾವೀಣ್ಯತೆಯ ಪ್ರಶ್ನಾವಳಿ (LEAP-Q) KANNADA**

|                                                                       |                                                                 |
|-----------------------------------------------------------------------|-----------------------------------------------------------------|
| ಮೊದಲ ಹೆಸರು:                                                           |                                                                 |
| ಕೌಟುಂಬಿಕ ಹೆಸರು:                                                       |                                                                 |
| ಇಂದಿನ ದಿನಾಂಕ:                                                         |                                                                 |
| ವಯಸ್ಸು:                                                               |                                                                 |
| ಲಿಂಗ:                                                                 | ಪುರುಷ: <input type="checkbox"/> ಮಹಿಳೆ: <input type="checkbox"/> |
| ದೂರವಾಣಿ ಸಂಖ್ಯೆ                                                        |                                                                 |
| ಇ-ಮೇಲ್ (ಲಭ್ಯವಿದ್ದರೆ)                                                  |                                                                 |
| ಹುಟ್ಟಿದ ದಿನಾಂಕ<br>(ಹುಟ್ಟಿದ ದಿನಾಂಕ ತಿಳಿದಿಲ್ಲದಿದ್ದರೆ ವಯಸ್ಸನ್ನು ನಮೂದಿಸಿ) |                                                                 |

1. ದಯವಿಟ್ಟು ನಿಮಗೆ ತಿಳಿದಿರುವ ಎಲ್ಲಾ ಭಾಷೆಗಳನ್ನು ನೀವು ಹೆಚ್ಚು ಬಳಸುವ ಮತ್ತು ತಿಳಿದಿರುವ ಭಾಷೆಗಳನ್ನು ಕ್ರಮದಲ್ಲಿ ಪಟ್ಟಿ ಮಾಡಿ

|    |    |    |    |    |
|----|----|----|----|----|
| 1. | 2. | 3. | 4. | 5. |
|----|----|----|----|----|

2. ದಯವಿಟ್ಟು ಎಲ್ಲಾ ಭಾಷೆಗಳನ್ನು ನೀವು ಕಲಿತ ಕ್ರಮದಲ್ಲಿ ಪಟ್ಟಿ ಮಾಡಿ (ನಿಮ್ಮ ಮಾತೃ ಭಾಷೆಯನ್ನೂ ಮೊದಲು ಉಲ್ಲೇಖಿಸಬೇಕು)

|    |    |    |    |    |
|----|----|----|----|----|
| 1. | 2. | 3. | 4. | 5. |
|----|----|----|----|----|

3. ನೀವು ಪ್ರಸ್ತುತ ಪ್ರತಿಭಾಷೆಯ ಬಳಕೆಯಲ್ಲಿ ಎಷ್ಟು ಸರಾಸರಿ ಸಮಯವನ್ನು ತೆಗೆದುಕೊಳ್ಳುವಿರಿ ಎಂಬುದನ್ನು ದಯವಿಟ್ಟು ಪಟ್ಟಿ ಮಾಡಿ.

(ಒಟ್ಟು ಶೇಕಡಾವಾರು 100% ಕ್ಕಿಂತ ಹೆಚ್ಚಾಗುವುದಿಲ್ಲ.)

|                            |  |  |  |  |  |
|----------------------------|--|--|--|--|--|
| ಭಾಷೆಯನ್ನು ಇಲ್ಲಿ ಪಟ್ಟಿ ಮಾಡಿ |  |  |  |  |  |
| ಇಲ್ಲಿ ಶೇಕಡಾವಾರು ಪಟ್ಟಿ ಮಾಡಿ |  |  |  |  |  |

4. ನಿಮಗೆ ತಿಳಿಯದ ಭಾಷೆಯಲ್ಲಿ ಒಂದು ಪಠ್ಯವನ್ನು ನೀಡಲಾಗಿದೆ ಎಂದು ಕಲ್ಪಿಸಿಕೊಳ್ಳಿ. ನಿಮಗೆ ತಿಳಿದಿರುವ ಪ್ರತಿಯೊಂದು ಭಾಷೆಗಳಲ್ಲಿ, ನೀವು ಅದನ್ನು ಓದುವ ಶೇಕಡಾವಾರು ಸಂಭವನೀಯತೆ ಎಷ್ಟು?

(ಒಟ್ಟು ಶೇಕಡಾವಾರು 100% ಕ್ಕಿಂತ ಹೆಚ್ಚಾಗುವುದಿಲ್ಲ.)

|                            |  |  |  |  |  |
|----------------------------|--|--|--|--|--|
| ಭಾಷೆಯನ್ನು ಇಲ್ಲಿ ಪಟ್ಟಿ ಮಾಡಿ |  |  |  |  |  |
| ಇಲ್ಲಿ ಶೇಕಡಾವಾರು ಪಟ್ಟಿ ಮಾಡಿ |  |  |  |  |  |

5. ನಿಮ್ಮಂತೆಯೇ ಆ ಎಲ್ಲಾ ಭಾಷೆಗಳನ್ನು ಸರಾಗವಾಗಿ/ಸುಗಮವಾಗಿ ಮಾತನಾಡುವ ವ್ಯಕ್ತಿಯೊಂದಿಗೆ ನೀವು ಮಾತನಾಡಲಿದ್ದೀರಿ ಎಂದು ಭಾವಿಸಿಕೊಂಡು ನೀವು ಎಷ್ಟು ಶೇಕಡಾವಾರು ಸಮಯ ಪ್ರತಿಯೊಂದು ಭಾಷೆಯನ್ನು ಮಾತನಾಡುತ್ತೀರಿ ಎಂದು ತಿಳಿಸಿ.

(ಒಟ್ಟು ಶೇಕಡಾವಾರು 100% ಕ್ಕಿಂತ ಹೆಚ್ಚಾಗುವುದಿಲ್ಲ)

|                            |  |  |  |  |  |
|----------------------------|--|--|--|--|--|
| ಭಾಷೆಯನ್ನು ಇಲ್ಲಿ ಪಟ್ಟಿ ಮಾಡಿ |  |  |  |  |  |
| ಇಲ್ಲಿ ಶೇಕಡಾವಾರು ಪಟ್ಟಿ ಮಾಡಿ |  |  |  |  |  |

6. ದಯವಿಟ್ಟು ನೀವು ನಿಮ್ಮನ್ನು ಯಾವ ಯಾವ ಸಂಸ್ಕೃತಿಗಳೊಂದಿಗೆ ಗುರುತಿಸಲ್ಪಡುತ್ತೀರಿ ಎಂಬುದನ್ನು ತಿಳಿಸಿ. ಸೊನ್ನೆಯಿಂದ ೧೦ ರವರೆಗಿನ ಪ್ರಮಾಣದಲ್ಲಿ ಗುರುತು ಮಾಡಿ, ನೀವು ಯಾವ ಯಾವ ಸಂಸ್ಕೃತಿಯೊಂದಿಗೆ ಎಷ್ಟು ಗುರುತಿಸಿಕೊಳ್ಳುತ್ತೀರಿ ಎಂಬುದನ್ನು ತಿಳಿಸಿ.

ಉದಾಹರಣೆ: ನಿಮ್ಮ ರಾಜ್ಯ, ನಿಮ್ಮ ಮಾತೃಭಾಷೆ, ನಿಮ್ಮ ಧರ್ಮವನ್ನು ತಿಳಿಸಿ,

ಭಾರತೀಯ ಸಂಸ್ಕೃತಿಯನ್ನು ಹೊರತುಪಡಿಸಿ ಇತರ ಸಂಸ್ಕೃತಿಯಾದರೆ ಅದನ್ನು ಸಹ ತಿಳಿಸಿ

|                             |  |  |  |  |  |
|-----------------------------|--|--|--|--|--|
| ಇಲ್ಲಿ ಸಂಸ್ಕೃತಿಗಳ ಪಟ್ಟಿ ಮಾಡಿ |  |  |  |  |  |
|-----------------------------|--|--|--|--|--|

0 - ಗುರುತಿಸಲ್ಪಡುವುದಿಲ್ಲ

1- ಸ್ವಲ್ಪ ಕಡಿಮೆ ಗುರುತಿಸಲ್ಪಡಲಾಗುವುದು

5 - ಮಧ್ಯಮ ಮಟ್ಟಿಗೆ ಗುರುತಿಸಲ್ಪಡಲಾಗುವುದು

10- ಸಂಪೂರ್ಣವಾಗಿ ಗುರುತಿಸಲ್ಪಡಲಾಗುವುದು

7. ನೀವು ಎಷ್ಟು ವರ್ಷಗಳ ಕಾಲ ಶಾಲಾ ಅಥವಾ ಕಾಲೇಜಿನ ಶಿಕ್ಷಣವನ್ನು ಹೊಂದಿದ್ದೀರಿ \_\_\_\_\_

ದಯವಿಟ್ಟು ನಿಮ್ಮ ವಿದ್ಯಾಭ್ಯಾಸದ ಉನ್ನತ/ಗರಿಷ್ಠ ಮಟ್ಟವನ್ನು ಆಯ್ಕೆ ಮಾಡಿ

ಕಿರಿಯ ಪ್ರಾಥಮಿಕ (1-5) ಪದವಿ (13-15) ವೃತ್ತಿಪರ ತರಬೇತಿ(8+)

ಹಿರಿಯ ಪ್ರಾಥಮಿಕ (6-7) ಸ್ನಾತಕೋತ್ತರ (16-17) ವೃತ್ತಿಪರ ತರಬೇತಿ (10+)

ಪ್ರೌಢಶಾಲೆ (8-10) ಡಾಕ್ಟರೇಟ್ (18-20) ವೃತ್ತಿಪರ ತರಬೇತಿ(12+)

ಪದವಿ ಪೂರ್ವ ಕಾಲೇಜು (11-12) ಇತರೆ ವೃತ್ತಿಪರ ತರಬೇತಿ(15+)

8. ನೀವು ಬೇರೆ ದೇಶದಿಂದ/ರಾಜ್ಯದಿಂದ ಕರ್ನಾಟಕಕ್ಕೆ ಬಂದಿದ್ದರೆ ,ನೀವು ಕರ್ನಾಟಕಕ್ಕೆ ಬಂದಿರುವ ದಿನಾಂಕವನ್ನು ತಿಳಿಸಿ, ನೀವು ಕರ್ನಾಟಕದಿಂದ ಬೇರೆ ದೇಶಕ್ಕೆ/ರಾಜ್ಯಕ್ಕೆ ಹೋಗಿದ್ದರೆ ,ಆ ದೇಶ/ರಾಜ್ಯದ ಹೆಸರು ಮತ್ತು ಹೋಗಿದ್ದ ದಿನಾಂಕವನ್ನು ತಿಳಿಸಿ.

|                       |  |
|-----------------------|--|
| ಮೂಲ ದೇಶ /ಮೂಲ ಪ್ರಾಂತ್ಯ |  |
| ಹೊಸ ದೇಶ /ಹೊಸ ಪ್ರಾಂತ್ಯ |  |
| ದಿನಾಂಕ                |  |

9. ನೀವು ಎಂದಾದರೂ ಈ ಕೆಳಗಿನ ಯಾವುದೇ ಸಮಸ್ಯೆಗಳನ್ನು ಹೊಂದಿದ್ದೀರೇ ತಿಳಿಸಿ

ದೃಷ್ಟಿ ದೋಷ ☐ ಶ್ರವಣ ದೋಷ ☐  
ಮಾತಿನ ಅಥವಾ ಭಾಷಾ ತೊಂದರೆ ☐ ಕಲಿಕಾ ನ್ಯೂನತೆ ☐

(ಅನ್ವಯವಾಗುವ ಎಲ್ಲವನ್ನೂ ಗುರುತು ಮಾಡಿ)

ಹೌದು ಎಂದಾದರೆ, ಸಮಸ್ಯೆಯನ್ನು ಸಂಕ್ಷಿಪ್ತವಾಗಿ ವಿವರಿಸಿ ಮತ್ತು ಏನು ಚಿಕಿತ್ಸೆ ಪಡೆದಿದ್ದೀರಿ ಎಂಬುದನ್ನು ವಿವರಿಸಿ

**ಭಾಷೆ 1(ಮಾತೃ ಭಾಷೆ)** \_\_\_\_\_

ಕೆಳಗೆ ನೀಡಲಾದ ಪ್ರಶ್ನೆಗಳು , ಈ ಭಾಷೆಯ ಬಗ್ಗೆ ನಿಮಗೆ ಇರುವ ಅರಿವನ್ನು ಸೂಚಿಸುತ್ತದೆ

1. ಯಾವ ವಯಸ್ಸಿನಲ್ಲಿ ನೀವು ಈ ಭಾಷೆಯನ್ನು

ಕಲಿಯಲು ಪ್ರಾರಂಭಿಸಿದಿರಿ \_\_\_\_\_

ಸರಾಗವಾಗಿ ಮಾತನಾಡುವುದನ್ನು ಕಲಿತಿರಿ \_\_\_\_\_

ಓದಲು ಪ್ರಾರಂಭಿಸಿದಿರಿ \_\_\_\_\_

ಸರಾಗವಾಗಿ ಓದಲು ಕಲಿತಿರಿ \_\_\_\_\_

2. ದಯವಿಟ್ಟು ಈ ಕೆಳಗಿನ ಭಾಷಾ ವಾತಾವರಣದಲ್ಲಿ ನೀವು ಕಳೆದ ವರ್ಷಗಳು ಮತ್ತು ತಿಂಗಳುಗಳನ್ನು ತಿಳಿಸಿ

|                                      | ವರ್ಷ | ತಿಂಗಳು |
|--------------------------------------|------|--------|
| ದೇಶದಲ್ಲಿ/ ರಾಜ್ಯದಲ್ಲಿ ಮಾತನಾಡುವಾಗ      |      |        |
| ಕುಟುಂಬದಲ್ಲಿ/ಪರಿವಾರದಲ್ಲಿ ಮಾತನಾಡುವಾಗ   |      |        |
| ಶಾಲೆ ಅಥವಾ ಕಾರ್ಯ ಸ್ಥಳದಲ್ಲಿ ಮಾತನಾಡುವಾಗ |      |        |

3. ಈ ಭಾಷೆಯನ್ನು ಮಾತನಾಡುವಾಗ, ಅರ್ಥಮಾಡಿಕೊಳ್ಳುವಾಗ ಮತ್ತು ಓದುವಾಗ ನಿಮ್ಮ ಪ್ರಾವೀಣ್ಯತೆಯ ಮಟ್ಟವನ್ನು ಈ ಕೆಳಕಂಡ ಸೊನ್ನೆಯಿಂದ ಹತ್ತರವರೆಗಿನ ಪ್ರಮಾಣದಲ್ಲಿ ಗುರುತು ಮಾಡಿ.

0- ಎಂದಿಗೂ ಇಲ್ಲ      1-ತುಂಬಾ ಕಡಿಮೆ      2-ಕಡಿಮೆ      3-ಸಾಧಾರಣ      4-ಸ್ವಲ್ಪ ಕಡಿಮೆ

5-ಸಾಕಷ್ಟು      6-ಸಾಕಷ್ಟು ಹೆಚ್ಚು      7-ಉತ್ತಮ      8- ಅತ್ಯುತ್ತಮ      9-ಶ್ರೇಷ್ಠ

10- ಸಂಪೂರ್ಣವಾಗಿ

4. ನಿಮ್ಮ ಭಾಷಾ ಕಲಿಕೆಗೆ ಈ ಕೆಳಗಿನ ಅಂಶಗಳು ಎಷ್ಟರ ಮಟ್ಟಿಗೆ ಕೊಡುಗೆ ನೀಡಿವೆ ಎಂಬುದನ್ನು ಈ ಕೆಳಕಂಡ ಸೊನ್ನೆಯಿಂದ ಹತ್ತರ ಪ್ರಮಾಣದಲ್ಲಿ ಗುರುತು ಮಾಡಿ.

0-ಕೊಡುಗೆ ಇಲ್ಲ      1-ಕನಿಷ್ಠ ಕೊಡುಗೆ      2-      3-  
4-      5-ಮಧ್ಯಮ ಮಟ್ಟದ ಕೊಡುಗೆ      6-      7-  
8-      9-      10-ಅತ್ಯಂತ ಮಹತ್ವದ ಕೊಡುಗೆ

- ಸ್ನೇಹಿತರೊಂದಿಗಿನ ಸಂಭಾಷಣೆಯಲ್ಲಿ \_\_\_\_\_
- ಕುಟುಂಬದ / ಪರಿವಾರದೊಂದಿಗಿನ ಸಂಭಾಷಣೆಯಲ್ಲಿ \_\_\_\_\_
- ಓದುವಾಗ \_\_\_\_\_
- ತಮಗೆ ತಾವೇ ಮಾತನಾಡಿಕೊಳ್ಳುವಾಗ / ಸ್ವಯಂ ಸೂಚನೆ ಮಾಡುವಾಗ \_\_\_\_\_
- ಟಿವಿ / ದೂರದರ್ಶನ ನೋಡುವಾಗ \_\_\_\_\_
- ರೇಡಿಯೋ/ಆಕಾಶವಾಣಿ ಕೇಳಿಸಿಕೊಳ್ಳುವಾಗ \_\_\_\_\_

5. ಈ ಕೆಳಗಿನ ಸಂದರ್ಭಗಳಲ್ಲಿ ನೀವು ಈ ಭಾಷೆಯನ್ನು ಎಷ್ಟರ ಮಟ್ಟಿಗೆ ಮಾತನಾಡುತ್ತೀರ ಅಥವಾ ಕೇಳಿಸಿಕೊಳ್ಳುತ್ತೀರ ಎಂಬುದನ್ನು ಈ ಕೆಳಕಂಡ ಸೊನ್ನೆಯಿಂದ ಹತ್ತರವರೆಗಿನ ಪ್ರಮಾಣದಲ್ಲಿ ಗುರುತು ಮಾಡಿ.

0- ಎಂದೆಂದಿಗೂ ಇಲ್ಲ      1- ಹೆಚ್ಚಾಗಿ ಇಲ್ಲ      2-      3-  
4-      5- ಅರ್ಧ ಸಮಯದಲ್ಲಿ ಮಾತ್ರ      6-      7-  
8-      9-      10- ಯಾವಾಗಲೂ

- ಸ್ನೇಹಿತರೊಂದಿಗಿನ ಸಂಭಾಷಣೆಯಲ್ಲಿ \_\_\_\_\_
- ಕುಟುಂಬದ / ಪರಿವಾರದೊಂದಿಗಿನ ಸಂಭಾಷಣೆಯಲ್ಲಿ \_\_\_\_\_
- ಓದುವಾಗ \_\_\_\_\_
- ತಮಗೆ ತಾವೇ ಮಾತನಾಡಿಕೊಳ್ಳುವಾಗ / ಸ್ವಯಂ ಸೂಚನೆ ಮಾಡುವಾಗ \_\_\_\_\_
- ಟಿವಿ / ದೂರದರ್ಶನ ನೋಡುವಾಗ \_\_\_\_\_
- ರೇಡಿಯೋ/ಆಕಾಶವಾಣಿ ಕೇಳಿಸಿಕೊಳ್ಳುವಾಗ \_\_\_\_\_

6. ನಿಮ್ಮ ಪ್ರಕಾರ, ನೀವು ಮಾತನಾಡುವ ಶೈಲಿಯಲ್ಲಿ ವಿದೇಶಿ ರೀತಿಯ ಉಚ್ಚಾರಣೆಗಳನ್ನು ಹೊಂದಿದ್ದೀರಾ? ಹೌದು ಎಂದಾದರೆ, ಎಷ್ಟು ಎಂಬುದನ್ನು ಈ ಕೆಳಕಂಡ ಪ್ರಮಾಣದಲ್ಲಿ ಗುರುತು ಮಾಡಿ.

- 1-ಎಂದೆಂದಿಗೂ ಇಲ್ಲ      2- ಹೆಚ್ಚಾಗಿ ಇಲ್ಲ      3- ಸ್ವಲ್ಪ ಮಟ್ಟಿಗೆ      4- ಕೆಲವೊಮ್ಮೆ  
 5- ಮಧ್ಯಮ ಮಟ್ಟಿಗೆ      6- ಹೆಚ್ಚಿನ ಮಟ್ಟಿಗೆ      7- ಸಾಕಷ್ಟು ಮಟ್ಟಿಗೆ      8- ಬಹಳಷ್ಟು  
 9- ತುಂಬಾ      10-ಸಂಪೂರ್ಣವಾಗಿ

7. ನಿಮ್ಮ ಭಾಷಾ ಶೈಲಿಯ ಆಧಾರದ ಮೇಲೆ ಇತರರು ನಿಮ್ಮನ್ನು ಸ್ಥಳೀಯರಲ್ಲ, ಎಂಬುದನ್ನು ಎಷ್ಟು ಬಾರಿ ಗುರುತಿಸುತ್ತಾರೆ ಎಂಬುದನ್ನು ದಯವಿಟ್ಟು ತಿಳಿಸಿ:

- 0- ಎಂದೆಂದಿಗೂ ಇಲ್ಲ      1-ಬಹುತೇಕ ಸಲ ಇಲ್ಲ      2-      3-  
 4-      5- ಅರ್ಧ ಸಮಯ ಮಾತ್ರ      6-      7-  
 8-      9-      10-ಯಾವಾಗಲೂ

## ಭಾಷೆ 2 \_\_\_\_\_

ಕೆಳಗೆ ನೀಡಲಾದ ಪ್ರಶ್ನೆಗಳು , ಈ ಭಾಷೆಯ ಬಗ್ಗೆ ನಿಮಗೆ ಇರುವ ಅರಿವನ್ನು ಸೂಚಿಸುತ್ತದೆ

1. ಯಾವ ವಯಸ್ಸಿನಲ್ಲಿ ನೀವು ಈ ಭಾಷೆಯನ್ನು

ಕಲಿಯಲು ಪ್ರಾರಂಭಿಸಿದಿರಿ \_\_\_\_\_

ಸರಾಗವಾಗಿ ಮಾತನಾಡುವುದನ್ನು ಕಲಿತಿರಿ \_\_\_\_\_

ಓದಲು ಪ್ರಾರಂಭಿಸಿದಿರಿ \_\_\_\_\_

ಸರಾಗವಾಗಿ ಓದಲು ಕಲಿತಿರಿ \_\_\_\_\_

2. ದಯವಿಟ್ಟು ಈ ಕೆಳಗಿನ ಭಾಷಾ ವಾತಾವರಣದಲ್ಲಿ ನೀವು ಕಳೆದ ವರ್ಷಗಳು ಮತ್ತು ತಿಂಗಳುಗಳನ್ನು ತಿಳಿಸಿ

|                                      | ವರ್ಷ | ತಿಂಗಳು |
|--------------------------------------|------|--------|
| ದೇಶದಲ್ಲಿ/ ರಾಜ್ಯದಲ್ಲಿ ಮಾತನಾಡುವಾಗ      |      |        |
| ಕುಟುಂಬದಲ್ಲಿ/ಪರಿವಾರದಲ್ಲಿ ಮಾತನಾಡುವಾಗ   |      |        |
| ಶಾಲೆ ಅಥವಾ ಕಾರ್ಯ ಸ್ಥಳದಲ್ಲಿ ಮಾತನಾಡುವಾಗ |      |        |

3. ಈ ಭಾಷೆಯನ್ನು ಮಾತನಾಡುವಾಗ, ಅರ್ಥಮಾಡಿಕೊಳ್ಳುವಾಗ ಮತ್ತು ಓದುವಾಗ ನಿಮ್ಮ ಪ್ರಾವೀಣ್ಯತೆಯ ಮಟ್ಟವನ್ನು ಈ ಕೆಳಕಂಡ ಸೊನ್ನೆಯಿಂದ ಹತ್ತರವರೆಗಿನ ಪ್ರಮಾಣದಲ್ಲಿ ಗುರುತು ಮಾಡಿ.

0- ಎಂದಿಗೂ ಇಲ್ಲ 1-ತುಂಬಾ ಕಡಿಮೆ 2-ಕಡಿಮೆ 3-ಸಾಧಾರಣ 4-ಸ್ವಲ್ಪ ಕಡಿಮೆ

5-ಸಾಕಷ್ಟು 6-ಸಾಕಷ್ಟು ಹೆಚ್ಚು 7-ಉತ್ತಮ 8- ಅತ್ಯುತ್ತಮ 9-ಶ್ರೇಷ್ಠ

10- ಸಂಪೂರ್ಣವಾಗಿ

4. ನಿಮ್ಮ ಭಾಷಾ ಕಲಿಕೆಗೆ ಈ ಕೆಳಗಿನ ಅಂಶಗಳು ಎಷ್ಟರ ಮಟ್ಟಿಗೆ ಕೊಡುಗೆ ನೀಡಿವೆ ಎಂಬುದನ್ನು ಈ ಕೆಳಕಂಡ ಸೊನ್ನೆಯಿಂದ ಹತ್ತರ ಪ್ರಮಾಣದಲ್ಲಿ ಗುರುತು ಮಾಡಿ.

0-ಕೊಡುಗೆ ಇಲ್ಲ 1-ಕನಿಷ್ಠ ಕೊಡುಗೆ 2- 3-  
4- 5-ಮಧ್ಯಮ ಮಟ್ಟದ ಕೊಡುಗೆ 6- 7-  
8- 9- 10-ಅತ್ಯಂತ ಮಹತ್ವದ ಕೊಡುಗೆ

- ಸ್ನೇಹಿತರೊಂದಿಗಿನ ಸಂಭಾಷಣೆಯಲ್ಲಿ \_\_\_\_\_
- ಕುಟುಂಬದ / ಪರಿವಾರದೊಂದಿಗಿನ ಸಂಭಾಷಣೆಯಲ್ಲಿ \_\_\_\_\_
- ಓದುವಾಗ \_\_\_\_\_
- ತಮಗೆ ತಾವೇ ಮಾತನಾಡಿಕೊಳ್ಳುವಾಗ / ಸ್ವಯಂ ಸೂಚನೆ ಮಾಡುವಾಗ \_\_\_\_\_
- ಟಿವಿ / ದೂರದರ್ಶನ ನೋಡುವಾಗ \_\_\_\_\_
- ರೇಡಿಯೋ/ಆಕಾಶವಾಣಿ ಕೇಳಿಸಿಕೊಳ್ಳುವಾಗ \_\_\_\_\_

5. ಈ ಕೆಳಗಿನ ಸಂದರ್ಭಗಳಲ್ಲಿ ನೀವು ಈ ಭಾಷೆಯನ್ನು ಎಷ್ಟರ ಮಟ್ಟಿಗೆ ಮಾತನಾಡುತ್ತೀರ ಅಥವಾ ಕೇಳಿಸಿಕೊಳ್ಳುತ್ತೀರ ಎಂಬುದನ್ನು ಈ ಕೆಳಕಂಡ ಸೊನ್ನೆಯಿಂದ ಹತ್ತರವರೆಗಿನ ಪ್ರಮಾಣದಲ್ಲಿ ಗುರುತು ಮಾಡಿ.

0- ಎಂದೆಂದಿಗೂ ಇಲ್ಲ 1- ಹೆಚ್ಚಾಗಿ ಇಲ್ಲ 2- 3-  
4- 5- ಅರ್ಧ ಸಮಯದಲ್ಲಿ ಮಾತ್ರ 6- 7-  
8- 9- 10- ಯಾವಾಗಲೂ

- ಸ್ನೇಹಿತರೊಂದಿಗಿನ ಸಂಭಾಷಣೆಯಲ್ಲಿ \_\_\_\_\_
- ಕುಟುಂಬದ / ಪರಿವಾರದೊಂದಿಗಿನ ಸಂಭಾಷಣೆಯಲ್ಲಿ \_\_\_\_\_
- ಓದುವಾಗ \_\_\_\_\_
- ತಮಗೆ ತಾವೇ ಮಾತನಾಡಿಕೊಳ್ಳುವಾಗ / ಸ್ವಯಂ ಸೂಚನೆ ಮಾಡುವಾಗ \_\_\_\_\_
- ಟಿವಿ / ದೂರದರ್ಶನ ನೋಡುವಾಗ \_\_\_\_\_
- ರೇಡಿಯೋ/ಆಕಾಶವಾಣಿ ಕೇಳಿಸಿಕೊಳ್ಳುವಾಗ \_\_\_\_\_

6. ನಿಮ್ಮ ಪ್ರಕಾರ, ನೀವು ಮಾತನಾಡುವ ಶೈಲಿಯಲ್ಲಿ ವಿದೇಶಿ ರೀತಿಯ ಉಚ್ಚಾರಣೆಗಳನ್ನು ಹೊಂದಿದ್ದೀರಾ? ಹೌದು ಎಂದಾದರೆ, ಎಷ್ಟು ಎಂಬುದನ್ನು ಈ ಕೆಳಕಂಡ ಪ್ರಮಾಣದಲ್ಲಿ ಗುರುತು ಮಾಡಿ.

- 1-ಎಂದೆಂದಿಗೂ ಇಲ್ಲ      2- ಹೆಚ್ಚಾಗಿ ಇಲ್ಲ      3- ಸ್ವಲ್ಪ ಮಟ್ಟಿಗೆ      4- ಕೆಲವೊಮ್ಮೆ  
 5- ಮಧ್ಯಮ ಮಟ್ಟಿಗೆ      6- ಹೆಚ್ಚಿನ ಮಟ್ಟಿಗೆ      7- ಸಾಕಷ್ಟು ಮಟ್ಟಿಗೆ      8- ಬಹಳಷ್ಟು  
 9- ತುಂಬಾ      10-ಸಂಪೂರ್ಣವಾಗಿ

7. ನಿಮ್ಮ ಭಾಷಾ ಶೈಲಿಯ ಆಧಾರದ ಮೇಲೆ ಇತರರು ನಿಮ್ಮನ್ನು ಸ್ಥಳೀಯರಲ್ಲ, ಎಂಬುದನ್ನು ಎಷ್ಟು ಬಾರಿ ಗುರುತಿಸುತ್ತಾರೆ ಎಂಬುದನ್ನು ದಯವಿಟ್ಟು ತಿಳಿಸಿ:

- 0- ಎಂದೆಂದಿಗೂ ಇಲ್ಲ      1-ಬಹುತೇಕ ಸಲ ಇಲ್ಲ      2-      3-  
 4-      5- ಅರ್ಧ ಸಮಯ ಮಾತ್ರ      6-      7-  
 8-      9-      10-ಯಾವಾಗಲೂ
