# Supplementary material
Source: publisher figshare collection journal article supplement (https://asha.figshare.com/articles/dataset/_/23631519)
Supplement: Supplementary file 2 [file 1]

**Supplemental Material S2.** An English version of each question of KLEAP-Q.

**Language X**

Please answer all the questions which are mentioned below, these questions target on your first language knowledge

1. At what age you

Started Acquiring language \_\_\_\_\_

Started Fluent Speaking in language \_\_\_\_\_

Started Reading in language \_\_\_\_\_

Started Fluent Reading in language \_\_\_\_\_

2. Please mention the number of years and month you spent in below mentioned language environment.

|                                          | Years | Months |
|------------------------------------------|-------|--------|
| When speaking in country/state           |       |        |
| When speaking with family members        |       |        |
| When speaking in school/work environment |       |        |

3. When your speaking, understanding and reading this language how proficient you are? Please mention the proficiency from 0 to 10 point rating scale.

0- Not Proficient      1- Very less proficient      2- Less proficient      3- Average      4-  
5- Sufficient      6- More proficiency      7- Good      8- Very good      9- Excellent  
10- Complete

4. Using a scale of 0 to 10, please mention how much the following factors helped you in learning the language.

0- No Contribution      1- Minimal      2-      3-  
4-      5- Moderate      6-      7-  
8-      9-      10- Major

Talking with friends \_\_\_\_\_

Talking with family \_\_\_\_\_

Reading \_\_\_\_\_

Self-instructions \_\_\_\_\_

Watching television \_\_\_\_\_

Listening to radio \_\_\_\_\_

5. Please rate at what extent you listen or speak this language in different language context from a scale of 0 to 10 point rating scale.

|          |                    |            |    |
|----------|--------------------|------------|----|
| 0- Never | 1- Almost never    | 2-         | 3- |
| 4-       | 5- Some times only | 6-         | 7- |
| 8-       | 9-                 | 10- Almost |    |

When conversing with friends \_\_\_\_\_

When conversing with family members \_\_\_\_\_

Reading \_\_\_\_\_

When talking to yourself/ when providing self instructions \_\_\_\_\_

When watching television \_\_\_\_\_

When listening to radio \_\_\_\_\_

6. In your perception, do you have foreign accent in your speech? If yes, rate it according to the scale given below.

|            |                      |                  |                    |
|------------|----------------------|------------------|--------------------|
| 1- Never   | 2- Almost Never      | 3- Few times     | 4- Sometimes       |
| 5- Average | 6- Most of the times | 7- Almost always | 8- Very frequently |
| 9- More    | 10- Completely       |                  |                    |

7. How frequently people will identify you as a non-native speaker of language based upon your speaking style.

|          |                     |            |    |
|----------|---------------------|------------|----|
| 0- Never | 1- Most of the time | 2-         | 3- |
| 4-       | 5- Sometimes only   | 6-         | 7- |
| 8-       | 9-                  | 10- Always |    |
